# Supplementary material
Source: publisher figshare collection journal article supplement (https://gsajournals.figshare.com/ndownloader/files/23777591)
Supplement: Supplementary file 1 [file 23777591]

## Sheet: Sheet1
Table S8. Spore viability and aneuploidy data of the 35 MA lines and their parent strains.
* From Dutta et al., 2017
Line	Tetrads	Spore Viability (%)	Chromosomes with aneuploidy
S/R	60	88.75	0
S/R_1	78	76.6	0
S/R_2	80	51.25	0
S/R_3	81	41.04	0
S/R_4	75	88.75	0
S/R_5	39	83.33	0
S/R_6	80	45.93	0
S/R_7	78	18.59	0
S/R_8	79	89.55	0
S/R_9	96	8.07	0
S/R_10	77	27.27	0
S/Y_P*	180	85	0
S/Y_1	80	98.12	0
S/Y_2	78	44.23	0
S/Y_3	80	94.37	0
S/Y_4	101	40.84	0
S/Y_5	96	40.36	0
S/Y_6	40	95.63	0
S/Y_7	80	84.68	0
S/Y_8	40	96.25	0
S/Y_9	78	88.46	X
S/Y_10	79	76.18	0
RR_P	60	97.91	Partially aneuploid for IX?
RR_1	80	95.62	IX
RR_2	79	89.27	IX
RR_3	78	97.5	IX
RR_4	80	94.06	IX, XI
RR_5	80	94.37	IX, XI
YY_P	60	93.33	0
YY_1	40	95.63	0
YY_2	36	89.58	0
YY_3	77	89.28	0
YY_4	42	90.48	0
YY_5	79	94.37	XII
SS_P	37	92.06	0
SS_1	77	40.19	0
SS_2	78	91.66	0
SS_3	77	42.2	0
SS_4	38	80.26	0
SS_5	Could not dissect		0
